# Supplementary material for: Comparison Epidemiology between Tuberculosis and COVID-19 in East Java Province, Indonesia: An Analysis of Regional Surveillance Data in 2020
Source: MDPI journal article supplement (doi:10.3390/tropicalmed7060083), 2022-05-27
Supplement: s1 [file s1]

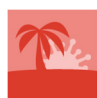

# Supplementary Materials: Comparison Epidemiology between Tuberculosis and COVID-19 in East Java Province, Indonesia: An Analysis of Regional Surveillance Data in 2020

Budi Utomo <sup>1,\*</sup>, Chow Khuen Chan <sup>2</sup>, Ni Made Mertaniasih <sup>3,4</sup>, Soedarsono Soedarsono <sup>5</sup>, Shifa Fauziyah <sup>6</sup>, Teguh Hari Sucipto <sup>7</sup>, Febriana Aquaresta <sup>8</sup>, Dwinka Syafira Eljatin <sup>9</sup> and I Made Dwi Mertha Adnyana <sup>9</sup>

**Table S1.** The demographical factor analysis (Ratio number of public health center, ratio number of doctor, and ratio number of nurse/100,000 populations)

| No. | Residence        | Ratio Number of Public Health Centre/100,000 Inhabitants | Ratio Number of Doctor/100,000 Inhabitants | Ratio Number of Nurse |
|-----|------------------|----------------------------------------------------------|--------------------------------------------|-----------------------|
| 1   | Pacitan          | 4.32                                                     | 4.68                                       | 113.13                |
| 2   | Ponorogo         | 3.56                                                     | 5.39                                       | 157.14                |
| 3   | Trenggalek       | 3.15                                                     | 3.87                                       | 128.15                |
| 4   | Tulungagung      | 3.07                                                     | 4.60                                       | 140.24                |
| 5   | Blitar           | 2.06                                                     | 3.69                                       | 72.87                 |
| 6   | Kediri           | 2.34                                                     | 5.95                                       | 83.22                 |
| 7   | Malang           | 1.49                                                     | 3.93                                       | 104.39                |
| 8   | Lumajang         | 2.39                                                     | 4.69                                       | 128.55                |
| 9   | Jember           | 2.03                                                     | 5.57                                       | 93.70                 |
| 10  | Banyuwangi       | 2.78                                                     | 6.61                                       | 108.73                |
| 11  | Bondowoso        | 3.21                                                     | 6.16                                       | 137.52                |
| 12  | Situbondo        | 2.92                                                     | 6.12                                       | 132.40                |
| 13  | Probolinggo      | 2.81                                                     | 4.00                                       | 85.03                 |
| 14  | Pasuruan         | 2.02                                                     | 3.54                                       | 74.31                 |
| 15  | Sidoarjo         | 1.14                                                     | 8.63                                       | 132.68                |
| 16  | Mojokerto        | 2.40                                                     | 4.62                                       | 121.54                |
| 17  | Jombang          | 2.68                                                     | 5.36                                       | 137.48                |
| 18  | Nganjuk          | 1.89                                                     | 3.22                                       | 112.96                |
| 19  | Madiun           | 3.80                                                     | 5.26                                       | 113.49                |
| 20  | Magetan          | 3.50                                                     | 5.09                                       | 109.06                |
| 21  | Ngawi            | 2.89                                                     | 7.47                                       | 139.25                |
| 22  | Bojonegoro       | 2.88                                                     | 4.71                                       | 107.67                |
| 23  | Tuban            | 2.80                                                     | 4.42                                       | 78.42                 |
| 24  | Lamongan         | 2.77                                                     | 4.37                                       | 156.64                |
| 25  | Gresik           | 2.41                                                     | 6.86                                       | 128.16                |
| 26  | Bangkalan        | 2.21                                                     | 3.02                                       | 101.29                |
| 27  | Sampang          | 2.12                                                     | 2.02                                       | 47.32                 |
| 28  | Pamekasan        | 2.25                                                     | 2.81                                       | 128.91                |
| 29  | Sumenep          | 2.75                                                     | 2.93                                       | 101.80                |
| 30  | Kediri City      | 3.11                                                     | 38.74                                      | 493.59                |
| 31  | Blitar City      | 2.10                                                     | 27.31                                      | 478.30                |
| 32  | Malang City      | 1.83                                                     | 17.72                                      | 379.02                |
| 33  | Probolinggo city | 2.51                                                     | 20.08                                      | 235.12                |
| 34  | Pasuruan City    | 3.97                                                     | 19.84                                      | 236.13                |
| 35  | Mojokerto City   | 4.62                                                     | 26.18                                      | 597.42                |
| 36  | Madiun City      | 3.38                                                     | 18.60                                      | 620.63                |
| 37  | Surabaya City    | 2.17                                                     | 15.04                                      | 303.43                |
| 38  | Batu City        | 2.39                                                     | 12.91                                      | 217.10                |

**Table S2.** The demographical factor analysis (Ratio number of midwifery, ratio number of public health workers, and ratio number of environmental health workers/100,000 populations).

| No. | Residence        | Ratio Number of Midwifery | Ratio Number of Public Health Workers | Ratio Number of Environmental Health Workers |
|-----|------------------|---------------------------|---------------------------------------|----------------------------------------------|
| 1   | Pacitan          | 67.27                     | 8.63                                  | 9.71                                         |
| 2   | Ponorogo         | 69.85                     | 5.39                                  | 5.28                                         |
| 3   | Trenggalek       | 57.05                     | 6.88                                  | 7.31                                         |
| 4   | Tulungagung      | 58.38                     | 4.12                                  | 4.31                                         |
| 5   | Blitar           | 48.20                     | 2.49                                  | 2.41                                         |
| 6   | Kediri           | 52.40                     | 3.73                                  | 4.81                                         |
| 7   | Malang           | 32.90                     | 0.95                                  | 2.14                                         |
| 8   | Lumajang         | 56.47                     | 6.70                                  | 3.64                                         |
| 9   | Jember           | 0.04                      | 4.96                                  | 1.14                                         |
| 10  | Banyuwangi       | 0.07                      | 2.60                                  | 2.29                                         |
| 11  | Bondowoso        | 79.74                     | 3.72                                  | 4.37                                         |
| 12  | Situbondo        | 97.41                     | 5.54                                  | 4.08                                         |
| 13  | Probolinggo      | 61.03                     | 2.81                                  | 2.55                                         |
| 14  | Pasuruan         | 45.80                     | 3.36                                  | 2.63                                         |
| 15  | Sidoarjo         | 43.25                     | 5.26                                  | 2.19                                         |
| 16  | Mojokerto        | 58.06                     | 2.57                                  | 3.20                                         |
| 17  | Jombang          | 90.66                     | 5.68                                  | 3.55                                         |
| 18  | Nganjuk          | 73.23                     | 1.99                                  | 3.78                                         |
| 19  | Madiun           | 62.15                     | 7.02                                  | 5.12                                         |
| 20  | Magetan          | 84.26                     | 4.61                                  | 6.20                                         |
| 21  | Ngawi            | 76.73                     | 6.38                                  | 5.90                                         |
| 22  | Bojonegoro       | 79.63                     | 4.55                                  | 3.67                                         |
| 23  | Tuban            | 41.72                     | 1.53                                  | 3.23                                         |
| 24  | Lamongan         | 81.56                     | 1.43                                  | 1.60                                         |
| 25  | Gresik           | 67.85                     | 4.30                                  | 2.26                                         |
| 26  | Bangkalan        | 99.88                     | 1.11                                  | 1.61                                         |
| 27  | Sampang          | 48.23                     | 3.94                                  | 1.92                                         |
| 28  | Pamekasan        | 74.87                     | 5.18                                  | 3.26                                         |
| 29  | Sumenep          | 88.70                     | 4.03                                  | 1.92                                         |
| 30  | Kediri City      | 153.92                    | 10.72                                 | 9.68                                         |
| 31  | Blitar City      | 109.25                    | 8.40                                  | 9.10                                         |
| 32  | Malang City      | 88.93                     | 7.54                                  | 6.97                                         |
| 33  | Probolinggo city | 81.58                     | 5.86                                  | 8.79                                         |
| 34  | Pasuruan City    | 111.12                    | 3.47                                  | 6.94                                         |
| 35  | Mojokerto City   | 133.96                    | 9.24                                  | 10.01                                        |
| 36  | Madiun City      | 156.15                    | 24.80                                 | 18.04                                        |
| 37  | Surabaya City    | 0.05                      | 14.11                                 | 7.71                                         |
| 38  | Batu City        | 53.08                     | 17.69                                 | 2.87                                         |

**Table S3.** The demographical factor analysis (Ratio number of nutritionist, ratio number of pharmacist, and incidence rate of HIV/100,000 populations).

| No. | Residence   | Ratio Number of Nutritionist | Ratio Number of Pharmacist | IR HIV |
|-----|-------------|------------------------------|----------------------------|--------|
| 1   | Pacitan     | 12.41                        | 10.43                      | 2.88   |
| 2   | Ponorogo    | 6.65                         | 7.11                       | 14.45  |
| 3   | Trenggalek  | 10.46                        | 6.16                       | 4.59   |
| 4   | Tulungagung | 7.57                         | 9.59                       | 22.81  |
| 5   | Blitar      | 6.27                         | 12.46                      | 7.99   |
| 6   | Kediri      | 7.21                         | 13.99                      | 10.95  |

|    |                  |       |       |       |
|----|------------------|-------|-------|-------|
|    |                  |       |       |       |
| 7  | Malang           | 4.50  | 4.27  | 10.11 |
| 8  | Lumajang         | 8.14  | 8.33  | 79.16 |
| 9  | Jember           | 4.31  | 2.97  | 28.86 |
| 10 | Banyuwangi       | 6.12  | 10.94 | 31.21 |
| 11 | Bondowoso        | 8.22  | 3.34  | 16.95 |
| 12 | Situbondo        | 8.90  | 5.54  | 35.73 |
| 13 | Probolinggo      | 4.85  | 3.92  | 13.11 |
| 14 | Pasuruan         | 4.27  | 3.24  | 16.24 |
| 15 | Sidoarjo         | 5.13  | 9.03  | 17.79 |
| 16 | Mojokerto        | 4.79  | 5.33  | 5.68  |
| 17 | Jombang          | 7.02  | 6.07  | 14.11 |
| 18 | Nganjuk          | 5.01  | 8.04  | 15.42 |
| 19 | Madiun           | 7.17  | 7.17  | 15.21 |
| 20 | Magetan          | 6.04  | 5.56  | 11.45 |
| 21 | Ngawi            | 7.59  | 6.02  | 11.68 |
| 22 | Bojonegoro       | 5.35  | 9.58  | 13.34 |
| 23 | Tuban            | 4.76  | 3.74  | 2.89  |
| 24 | Lamongan         | 5.63  | 5.72  | 12.53 |
| 25 | Gresik           | 4.07  | 7.31  | 6.03  |
| 26 | Bangkalan        | 3.22  | 3.32  | 2.21  |
| 27 | Sampang          | 4.04  | 0.81  | 9.40  |
| 28 | Pamekasan        | 5.18  | 7.32  | 4.17  |
| 29 | Sumenep          | 4.39  | 1.56  | 1.28  |
| 30 | Kediri City      | 20.06 | 26.98 | 80.94 |
| 31 | Blitar City      | 20.31 | 47.62 | 83.33 |
| 32 | Malang City      | 19.20 | 23.89 | 48.81 |
| 33 | Probolinggo city | 12.55 | 17.57 | 47.69 |
| 34 | Pasuruan City    | 11.91 | 19.35 | 25.30 |
| 35 | Mojokerto City   | 23.87 | 46.19 | 50.81 |
| 36 | Madiun City      | 32.13 | 72.72 | 65.39 |
| 37 | Surabaya City    | 10.67 | 17.08 | 27.06 |
| 38 | Batu City        | 12.91 | 25.34 | 9.09  |
